# Supplementary material for: Vaccarin suppresses renal fibrosis in diabetic nephropathy through inhibiting EGFR signaling pathway
Source: Research Square preprint supplement (doi:10.21203/rs.3.rs-2992331/v1), 2023-06-01
Supplement: Supplementary file 1 [file 6d3cc061d4d087bb1bf82047.docx]

**Vaccarin suppresses renal fibrosis in diabetic nephropathy through inhibiting EGFR signaling pathway**

Xuexue Zhua,1, Xinyao Dua,1, Xinyu Maa,1, Xinyu Menga,1, ChenyangZhaoa,1, Taiyue Lia,1, Xiaoyi Yua, Xuerui Zhub, Yuanyuan Wena, Bao Houa, Weiwei Caia, Fei Xua,*, Liying Qiua,*

aWuxi Medical School, Jiangnan University, Wuxi 214122, Jiangsu Province, PR China

bSchool of Pharmaceutical Sciences, Jiangnan University, Wuxi, 214122, Jiangsu Province, PR China

1 These authors contributed equally to this work (co-first authorship)

* Addresses for corresponding authors

**CONTACT INFORMATION:**

Fei Xu

Wuxi Medical School, Jiangnan University

Wuxi 214122, Jiangsu Province

PR China

E-mail addresses: [feixuhgd@163.com](mailto:feixuhgd@163.com)

Liying Qiu

Wuxi Medical School, Jiangnan University

Wuxi 214122, Jiangsu Province

PR China

E-mail addresses: [qiulydoc@sina.com](mailto:qiulydoc@sina.com)

**Table S1** Primers for real-time quantitative PCR analysis.

| Species | Gene | Sequence |
| --- | --- | --- |
| Mice | β-actin | F: ACCGCTCGTTGCCAATAGTGATG  R: ACCGCTCGTTGCCAATAGTGATG |
| Mice | Collagen Ⅰ | F: TGGTCCTGCTGGTCCTGCTG  R: CTGTCACCTTGTTCGCCTGTCTC |
| Mice | TGF-β1 | F: GCAACAATTCCTGGCGTTACCTTG  R: CAGCCACTGCCGTACAACTCC |
| Mice | E-cadherin | F: ATCCTGACCAGCAGTTCGTTGTTG  R: GTTCCTCGTTCTCCACTCTCACATG |
| Mice | α-SMA | F: GCTGACAGAGGCACCACTGAAC  R: AGTCACACCATCTCCAGAGTCCAG |
| Mice | IL-1β | F: TGGACCTTCCAGGATGAGGACA |
| R: GTTCATCTCGGAGCCTGTAGTG |
| Mice | VCAM1 | F: ATAGACAGCCCACTAAACGC |
| R: TCAATGACGGGAGTAAAGGT |
| Mice | COX-2 | F: TGAGCAACTATTCCAAACCAGC |
| R: GCACGTAGTCTTCGATCACTATC |
| Mice | p65-NFκB | F: GCTCCTAAGGTGCTGACA |
| R: ACCTCCGAAAGCGAGATA |
| Human | β-actin | F: CATGGAGTCCTGTGGCATCC  R: CTCCTTCTGCATCCTGTCGG |
| Human | Collagen Ⅰ | F: CCACCAATCACCTGCGTACAGAAC  R: TCACAGATCACGTCATCGCACAAC |
| Human | TGF-β1 | F: AGCAACAATTCCTGGCGATACCTC  R: TCAACCACTGCCGCACAACTC |
| Human | E-cadherin | F: ACAACGACCCAACCCAAGAATCTATC  R: CAAGAGCAGCAGAATCAGAATTAGC |
| Human | α-SMA | F: CTCTGGACGCACAACTGGCATC  R: CACGCTCAGCAGTAGTAACGAAGG |
| Human | IL-1β | F: TGAAAGCTCTCCACCTCCAGGGACA |
| R: GAGGCCCAAGGCCACAGGTATTTTG |
| Human | VCAM1 | F: CCTGCCATTGGAATGATAA |
| R: TGCTTCTACAAGACTATATGAC |
| Human | COX-2 | F: AACTCTGGCTAGACAGCGTAA |
| R: AACCGTAGATGCTCAGGGAC |
| Human | p65-NFκB | F: ACTGCCGGGATGGCTTCTAT |
| R: CCCACGCTGCTCTTCTTGGAA |

Note. α-SMA: α-smooth muscle actin; TGF-β1: transforming growth factor beta 1
